# Supplementary material
Source: PubMed Central journal article supplement (PMC3348858)
Supplement: NIHMS367973-supplement-1_si_001.pdf [file NIHMS367973-supplement-1_si_001.pdf]

13 **Table S1** Concentrations of individual PAHs in the soil before and after two bioremediation  
 14 processes (ng/mg dry soil) (n = 3).

| Compound   | BFS <sup>a</sup> | BTS <sup>a</sup> (at Day 7) | CPS <sup>a</sup> | CTR <sup>a</sup> (at Port A) | BIO <sup>a</sup> (at Port A) |
|------------|------------------|-----------------------------|------------------|------------------------------|------------------------------|
| NAP        | 22.3±2.5         | 16.5±0.1                    | 12.2±0.2         | 6.4±0.1                      | 10.4±0.9                     |
| ACE        | 22.2±2.2         | 1.8±0.2                     | 11.3±2.5         | 2.5±0.4                      | 2.8±0.4                      |
| FLU        | 15.2±1.7         | 2.5±0.2                     | 6.3±1.6          | 2.1±0.7                      | 1.7±0.2                      |
| PHN        | 226±17           | 50.1±14.4                   | 129±45           | 41.7±5.8                     | 27.2±0.3                     |
| ANT        | 9.1±1.0          | 2.0±0.3                     | 11.9±1.2         | 4.3±1.2                      | 2.3±0.5                      |
| FLA        | 55.8±6.9         | 11.5±1.9                    | 42.9±0.5         | 17.6±3.8                     | 9.1±2.3                      |
| PYR        | 80.9±5.2         | 25.4±4.6                    | 63.4±7.1         | 24.7±5.9                     | 17.1±3.8                     |
| BaA        | 36.4±4.3         | 12.1±0.3                    | 18.6±2.8         | 12.4±4.2                     | 5.8±1.3                      |
| CHR        | 34.6±3.8         | 17.8±2.3                    | 27.4±2.8         | 18.2±3.9                     | 7.2±0.2                      |
| BbF        | 13.4±0.7         | 8.3±0.8                     | 11.8±0.3         | 7.4±2.4                      | 4.8±0.8                      |
| BkF        | 10.8±1.4         | 6.8±0.8                     | 8.7±1.1          | 5.4±1.4                      | 3.2±0.6                      |
| BaP        | 13.7±1.3         | 8.4±1.5                     | 13.8±1.6         | 11.4±3.2                     | 7.2±1.6                      |
| DBA        | 1.9±0.1          | 1.3±0.1                     | 0.78±0.02        | 0±0                          | 0±0                          |
| BgP        | 23.1±2.8         | 13.5±0.9                    | 10.6±0.8         | 7.2±2.9                      | 6.4±1.4                      |
| Total PAHs | 566±50           | 178±20                      | 369±54           | 161±38                       | 105±12                       |

15 <sup>a</sup> BFS: untreated bioreactor feed soil; BTS: bioreactor treated soil; CPS: untreated column  
 16 packing soil; CTR: control-column treated soil; BIO: biostimulated-column treated soil.

17 **Table S2** Table of LD<sub>50</sub> for BPDE, MMS and H<sub>2</sub>O<sub>2</sub> as positive control (μg/L) (n = 3).

|                               | LD <sub>50</sub> (DT40)                  | LD <sub>50</sub> ( <i>Rad54</i> <sup>-/-</sup> ) |
|-------------------------------|------------------------------------------|--------------------------------------------------|
| BPDE                          | 49.6±8.5                                 | 27.0±2.7                                         |
| MMS                           | 7.1×10 <sup>3</sup> ±1.5×10 <sup>3</sup> | 1.7×10 <sup>3</sup> ±1.7×10 <sup>3</sup>         |
| H <sub>2</sub> O <sub>2</sub> | 61.2±8.5                                 | 34.7±3.4                                         |

18

19 **Table S3** Partial correlation coefficients and corresponding  $p$ -values among  $LD_{50}$ ,  $1/C_{tPAHs}$  and  
 20  $1/C_{residue}$ .

|                                                    | $LD_{50}(DT40)$                            | $LD_{50}(Rad54^{-/-})$                     |
|----------------------------------------------------|--------------------------------------------|--------------------------------------------|
| $1/C_{tPAHs}$ (Control Variable: $1/C_{residue}$ ) | 0.464 ( $p=0.08$ )                         | 0.482 ( $p=0.07$ )                         |
| $1/C_{residue}$ (Control Variable: $1/C_{tPAHs}$ ) | 0.789 <sup>a</sup> ( $p=7\times 10^{-4}$ ) | 0.836 <sup>a</sup> ( $p=1\times 10^{-4}$ ) |

21 <sup>a</sup> Partial correlation is significant at  $p<0.05$ .

22 **LD<sub>50</sub> calculation method**

23 LD<sub>50</sub> is calculated based on the dose-response relation as follows:

24 
$$\ln(R_{survival}) = a + b \cdot C_{exposure-residue} \quad (\text{Eq.1})$$

25 where,  $C_{exposure-residue}$  is the exposure concentration of residue ( $\mu\text{g/mL}$ );  $R_{survival}$  is the cell survival  
26 relative to vehicle control (%);  $a$  and  $b$  are fitting parameters.

27 For each residue sample, cells were exposed to 6 concentrations, thus generating 6 survival  
28 percentage values. The exposure concentration and the obtained cell survival percentage data  
29 were used to fit Eq. 1 to obtain the values of fitting parameters  $a$  and  $b$ . After  $a$  and  $b$  values  
30 were obtained,  $LD_{50-residue}$  was calculated as follows:

31 
$$LD_{50-residue} = (\ln 0.5 - a) / b \quad (\text{Eq. 2})$$

32  $LD_{50-residue}$  obtained from Eq. 2 is in terms of residue dose ( $\mu\text{g residue/mL}$ ). It was converted to  
33  $LD_{50-soil}$  in terms of soil dose ( $\text{mg soil/mL}$ ) as follows:

34 
$$LD_{50-soil} = LD_{50-residue} / C_{residue/soil}$$

35 where,  $C_{residue/soil}$  is the residue mass produced per unit soil ( $\mu\text{g residue/mg soil}$ ).

## 36 Test of benzo[*a*]pyrene metabolic activation by DT40 cell lines

37 The DT40 system has not been tested previously for its ability to activate compounds that  
38 require metabolic activation before exerting a genotoxic effect. Therefore, we evaluated the  
39 potential for metabolic activation by exposing DT40 parental cell line and its mutant *Rev3*<sup>-/-</sup> to  
40 benzo[*a*]pyrene (BaP). According to unpublished data from Dr. Nakamura's lab, *Rev3*<sup>-/-</sup> is  
41 sensitive to benzo[*a*]pyrene diolepoxide (BPDE), BaP's ultimate carcinogenic metabolite.

42 The DT40 and *Rev3*<sup>-/-</sup> were exposed to BaP using the method as described in Ridpath et al.  
43 (2011). The results are shown in Figure S1. A paired-sample t-test was applied to determine the  
44 significant differences of cell survival rate between the DT40 and *Rev3*<sup>-/-</sup>. The survival rate of  
45 *Rev3*<sup>-/-</sup> was significantly lower ( $p < 0.05$ ) than that of the DT40 parental cell line. Therefore, BaP  
46 could cause DNA damage response in *Rev3*<sup>-/-</sup>, which indicates that DT40 cells may have  
47 metabolic activation capacity for PAHs.

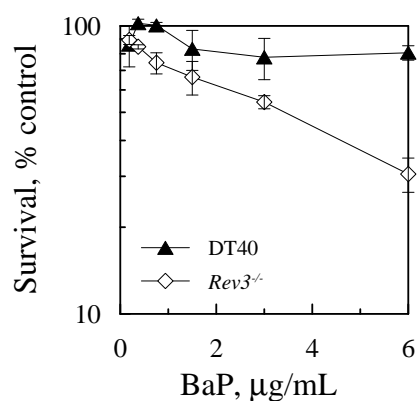

48  
49 **Figure S1.** Cell survival of DT40 parental cells and three mutants (*Rad54*<sup>-/-</sup>, *Rev3*<sup>-/-</sup> and *XPA*<sup>-/-</sup>)  
50 exposed to benzo[*a*]pyrene.

51 Ridpath, J. R.; Takeda, S.; Swenberg, J. A.; Nakamura, J. Convenient, multi-well plate-based DNA damage  
52 response analysis using DT40 mutants is applicable to a high-throughput genotoxicity assay with  
53 characterization of modes of action. *Environ. Mol. Mutagen.* **2011**, 52 (2), 153-160
